# Supplementary material for: Access to and utilisation of antimicrobials among forcibly displaced persons in Uganda, Yemen and Colombia: a pilot cross-sectional survey
Source: PubMed Central journal article supplement — BMJ Open. 2024 Jul 16;14(7):e084734. doi: 10.1136/bmjopen-2024-084734 (PMC11253744; doi:10.1136/bmjopen-2024-084734), 2024-07-16
Supplement: bmjopen-14-7-s002.pdf [file bmjopen-14-7-s002.pdf]

**A-1-بداية الكتلة :استخدام الدواء A-1-Use of medicine-Start of Block:**

In this part of the questionnaire, we will ask you about your access to and use of antimicrobials. Please answer the following questions only for one antibiotic. If you have taken more than one medicine, you will be directed to answer the following questions for each medicine

في هذا الجزء من الاستبيان، سنسألك عن إمكانية الوصول إلى مضادات الميكروبات واستخدامها. يرجى الإجابة على الأسئلة التالية فقط للحصول على مضاد حيوي واحد. إذا كنت قد تناولت أكثر من دواء واحد، سيتم توجيهك للإجابة على الأسئلة التالية لكل دواء

Yes نعم

No لا

**2. Have you GIVEN any antimicrobial agent (antibiotics for example cough or infection, or for malaria or worms) to your CHILD within the last 30 days?**

هل أعطيت أي عامل مضاد للميكروبات (المضادات الحيوية على سبيل المثال السعال أو العدوى، أو للملاريا أو الديدان) (لطفلك خلال الأيام 2. الثلاثين الماضية؟

Yes نعم

No لا

**3. What is the name of the antimicrobial agent that you took or gave your child?**

3. ما هو اسم العامل المضاد للميكروبات الذي أخذته أو أعطيته لطفلك؟

---

**4. What is the name of the company that produces the antibiotic?**

4. ما هو اسم الشركة التي تنتج المضاد الحيوي؟

---

**5. Where was it produced?**

5. أين تم إنتاجه؟

---

**6. What is the expiration date? Does it come in original packaging?**

6. ما هو تاريخ انتهاء الصلاحية؟ هل يأتي في التعبئة والتغليف الأصلي؟

---

---

**7. How often did you take or give the medicine?**

6. ما هو تاريخ انتهاء الصلاحية؟ هل يأتي في التعبئة والتغليف الأصلي؟

- Once a day مرة واحدة في اليوم
- Twice a day مرتين في اليوم
- Three times a day ثلاث مرات في اليوم
- More than three times a day. Please state: أكثر من ثلاث مرات في اليوم. يرجى ذكر: \_\_\_\_\_
- Every second day أسبوع
- Once a week مرة واحدة في الأسبوع
- Once a month مرة في الشهر
- Other. Please state: آخر. يرجى ذكر: \_\_\_\_\_

---

---

**8. Dosage Form of the medicine:** شكل الجرعة من الدواء:

- Tablet قرص
- Capsule كبسول
- Powder ذرور
- Suppository التحاميل
- Ointment/cream/gel/lotion/spray مرهم /كريم /هلام /محلول /رذاذ
- Syrup شراب
- Drops القطرات
- Injection حقن
- Other (Please specify): أخرى (يرجى تحديد): \_\_\_\_\_
- 

**9. How did you obtain this medicine?** كيف حصلت على هذا الدواء؟ 9.

- A doctor prescribed it. الطبيب وصفه
- Bought without a prescription from a pharmacy/ medicine store/ chemist. اشترى دون وصفة طبية من صيدلية / مخزن الدواء / الكيمائي.
- Given to me by a relative/friend نظرا لي من قبل أحد الأقارب /صديق
- Other (Please specify) أخرى (يرجى تحديد) \_\_\_\_\_
- 

**10. You take this antibiotic:** 10. كنت تأخذ هذا المضاد الحيوي:

- Regularly منتظمه
- When needed عند الحاجة
-

**10. Did you take the medicine for the complete period as prescribed by the doctor/ information provided within the packaging?** 10. هل أخذت الدواء للفترة الكاملة كما هو مقرر من قبل الطبيب /المعلومات المقدمة داخل العبوة؟

Yes نعم

No لا

---

**11. Do you stop taking the antibiotic when you feel better?** 11. هل تتوقف عن تناول المضاد الحيوي عندما تشعر بتحسن؟

Yes نعم

لا

---

**12. Do you stop taking the antibiotic when you feel worse?** 12. هل تتوقف عن تناول المضاد الحيوي عندما تشعر بالسوء؟

Yes نعم

No لا

---

**13. Are you satisfied with the quality of the medicine that you used or gave your child?** 13. هل أنت راض عن جودة الدواء الذي استخدمته أو أعطيته لطفلك؟

Satisfied قنع

Dissatisfied غير راضين

No knowledge لا معرفة

---

**14. Do you have a way of testing the quality of the medicine, for example by scratch card?** 14. هل لديك طريقة لاختبار جودة الدواء، على سبيل المثال عن طريق بطاقة الصفر؟

No لا

Yes نعم

---

15. هل يتأثر قرارك 15. هل يتأثر قرارك (Choose all that apply) 15. Is your decision about where to get the medicines influenced by? (Choose all that apply)  
بشأن مكان الحصول على الأدوية؟ (اختر كل ما ينطبق)

- Quality جودة
- Distance بون
- Price ثمن
- Other (Please specify): أخرى (يرجى تحديد): \_\_\_\_\_

16. كيف تم دفع ثمن الدواء؟ 16. How was the medicine paid for?

- Out-of-pocket (by myself) من جيبه (بنفسي)
- Insurance تأمين
- given at a health care facility (for free) مجاناً (مرفق الرعاية الصحية)
- Other آخر \_\_\_\_\_

17. Do you think the quality of the medicine where you now live is a problem? or

Are you or have ever been concerned about the quality of medicines, especially antimicrobials?

هل تعتقد أن نوعية الدواء الذي تعيش فيه الآن مشكلة؟ أو هل أنت أو كنت قلقاً بشأن جودة الأدوية، وخاصة مضادات الميكروبات؟ 17.

- No لا
- Yes نعم

End of Block: Use of medicine-A-1 A-1-نهاية الكتلة: استخدام الدواء

**18. Based on your experience, how much do these factors limit your access to antimicrobials in Colombia/ Uganda/ Yemen? [Please, fill one circle for each and every row]**

18. استنادا إلى تجربتك، ما مدى تقييد هذه العوامل لحصولك على مضادات الميكروبات في كولومبيا/أو غندا/اليمن؟ [من فضلك، شغل دائرة واحدة لكل 18. صف]

|                                                                                                  | No effect at all: 1<br>لا تأثير على الإطلاق: 1 | Mainly no effect<br>أساسا أي تأثير | Some effect<br>بعض التأثير | Mainly large effect<br>تأثير كبير أساسا | Very large effect<br>تأثير كبير جدا |
|--------------------------------------------------------------------------------------------------|------------------------------------------------|------------------------------------|----------------------------|-----------------------------------------|-------------------------------------|
| Language barriers<br>حواجز اللغة                                                                 | <input type="radio"/>                          | <input type="radio"/>              | <input type="radio"/>      | <input type="radio"/>                   | <input type="radio"/>               |
| Non-availability of certain medicines<br>عدم توافر أدوية معينة                                   | <input type="radio"/>                          | <input type="radio"/>              | <input type="radio"/>      | <input type="radio"/>                   | <input type="radio"/>               |
| Financial barrier<br>الحاجز المالي                                                               | <input type="radio"/>                          | <input type="radio"/>              | <input type="radio"/>      | <input type="radio"/>                   | <input type="radio"/>               |
| The medicine I need is a prescription-only medicine<br>الدواء الذي أحتاجه هو دواء بوصفة طبية فقط | <input type="radio"/>                          | <input type="radio"/>              | <input type="radio"/>      | <input type="radio"/>                   | <input type="radio"/>               |
| Time to reach the nearest health care center<br>حان الوقت للوصول إلى أقرب مركز للرعاية الصحية    | <input type="radio"/>                          | <input type="radio"/>              | <input type="radio"/>      | <input type="radio"/>                   | <input type="radio"/>               |
| Time to reach the nearest pharmacy<br>حان الوقت للوصول إلى أقرب صيدلية                           | <input type="radio"/>                          | <input type="radio"/>              | <input type="radio"/>      | <input type="radio"/>                   | <input type="radio"/>               |
| No trust in the staff at the healthcare center<br>لا ثقة في الموظفين في مركز الرعاية الصحية      | <input type="radio"/>                          | <input type="radio"/>              | <input type="radio"/>      | <input type="radio"/>                   | <input type="radio"/>               |

[Possible ideas for questions regarding trust: [الأفكار الممكنة للأسئلة المتعلقة بالثقة]:

a. Do you think there is a hostile behavior of healthcare workers towards refugees/IDPs? a. هل تعتقد أن هناك سلوك عدائي من العاملين في مجال الرعاية الصحية تجاه اللاجئين /النازحين داخليا؟

b. Do you feel you receive second class treatment because of your status as refugee/ IDPs? b. هل تشعر أنك تتلقى علاجاً من الدرجة الثانية بسبب وضعك كلاجئ/ النازحين داخليا؟

c. Do you feel that you have no saying in regard to the treatment of your health? (Paternalistic doctor patient relationship?) [ج. هل تشعر أنه ليس لديك قول فيما يتعلق بعلاج صحتك؟ (علاقة المريض الطبيب الأبوي؟)]

Start of Block: General Info-A -بداية الحظر: معلومات عامة

This section will address some general questions about you. □□□□□□ □□□ □□□□□ □□□ □□□□□□□□  
□□□ □□□□□□□.

19. Are you: 19. هل أنت:

- Male (1) 1) ذكر
- Female (2) 2) أنثى
- Prefer not to answer (3) 3) تفضل عدم الإجابة

20. How old are you? 20. كم عمرك؟

- 18-19 years 18-19 سنة
- 20-29 years 20-29 سنة
- 30-39 years 30-39 سنة
- 40-49 years 40-49 سنة
- 50-59 years 50-59 سنة
- 60-69 years 60-69 سنة
- 70 years or above 70 سنة أو أكثر
- 

21. What is your nationality? 21. ما هي جنسيتك؟

- Venezuelan/ South Sudanese/ Yemeni فنزويلا/ جنوب السودان/ يمني
- Other nationality (please specify): (جنسية أخرى) يرجى تحديد:
- 

22. What languages do you speak? 22. ما هي اللغات التي تتحدثها؟

---

---



23. Since when have you stayed in Colombia/Uganda/Yemen? 23. منذ متى أقمت في كولومبيا/أو غندا/اليمن؟

Year سنة \_\_\_\_\_

Month شهر \_\_\_\_\_

-----

24. What is the highest educational level have achieved? 24. ما هو أعلى مستوى تعليمي تم تحقيقه؟

- I did not receive any school education لم أحصل على أي تعليم مدرسي
- Primary school certificate شهادة المدرسة الابتدائية
- Intermediate school certificate شهادة المدرسة المتوسطة
- Secondary school certificate (General) شهادة الثانوية العامة
- Polytechnic secondary school education التعليم الثانوي في معهد الفنون التطبيقية
- Technical college الكلية التقنية
- University degree (Bachelor) شهادة جامعية (بكالوريوس)
- Higher University degree (Diploma, Master or PhD) شهادة جامعية عليا (دبلوم، ماجستير أو دكتوراه)
- Other (Please specify): أخرى (يرجى تحديد): \_\_\_\_\_

25. Which of the following describes your professional status? 25. أي مما يلي يصف وضعك المهني؟

- No, Not employed لا، غير مستخدم
- Yes, full – time employed نعم، كامل – الوقت المستخدم
- Yes, part-time employed نعم، موظف بدوام جزئي
- Yes, occasionally or irregularly employed نعم، في بعض الأحيان أو غير منتظمة العاملين
- Yes, vocational training/ apprenticeship/ student نعم، التدريب المهني/ التلمذة الصناعية/ الطالب
- Retired متقاعد
- Yes, temporarily released/ on leave (e.g. parental leave) نعم، أفرج عنه مؤقتا/ في إجازة (مثل الإجازة الوالدية)

**If there is something you want to tell us about your experience with accessing medicines here in Columbia/ Uganda/ Yemen, you can do it here:** إذا كان هناك شيء تريد أن نخبرنا عن تجربتك في الحصول على الأدوية هنا في كولومبيا / أو غندا / اليمن ، يمكنك القيام بذلك هنا

---

---

---

---

---

**End of Block: Social D-A** الاجتماعية D-A: نهاية الكتلة

---

شكرا جزيلا على المشاركة في هذا الاستطلاع Thank you very much for taking part in this survey

هل تقدمت بطلب اللجوء في كولومبيا/ أوغندا/ اليمن؟ **Did you apply for asylum in Colombia/ Uganda/ Yemen?**

نعم (1) Yes (1)

رقم (2) No (2)

---



Where you live is: حيث تعيش هو:

- Rural area ريف
- Small town (5,000 to 20,000 inhabitants) بلدة صغيرة (5,000 إلى 20,000 نسمة)
- Medium-sized town (20,000 to 70,000 inhabitants) مدينة متوسطة الحجم (20,000 إلى 70,000 نسمة)
- City (>100,000 inhabitants) >) المدينة (100,000 نسمة)

Where do you mainly live? أين تعيش أساساً؟

- In an temporary accommodation في سكن مؤقت
- In a communal accommodation في مكان إقامة مشترك
- In an apartment/a house في شقة /منزل
- In a shared apartment (WG) في شقة مشتركة (WG)
- Other (Please specify): (4) (4) أخرى (يرجى تحديد): \_\_\_\_\_

Since when do you live in your current apartment or accommodation? Please mention the year and month when you moved to the place where you live now. المكان الذي تعيش فيه الآن. يرجى ذكر السنة والشهر عندما انتقلت إلى المكان.

- Year (1) 1) السنة \_\_\_\_\_
- Month (2) 2) الشهر \_\_\_\_\_

(Adapted from the WHO household survey) (□□□□□ □□□□□□□□□□□ □□□□□□□ □□ □□□□□□  
□□□□□□□□ □□□□□ □□□□□ □□□□□□□ □□□□ □□□□□□□□□□)

How many rooms (bedrooms, dining room, kitchen) are in your home? (المطبخ، غرفة الطعام، غرفة النوم، عدد الغرف) كم عدد الغرف في منزلك؟

---

In the last week, how much did your household spend on food? (في الأسبوع الماضي، كم أنفقت أسرته على الطعام؟)

\_\_\_\_\_ (in local currency) (بالعملة المحلية)

Please choose the level of spending that is closest to what your household spent in total over the past 4 weeks (يرجى اختيار مستوى الإنفاق الأقرب إلى ما أنفقته أسرته في المجموع على مدى الأسابيع الـ 4 الماضية)

A

B

C

D

E

In the last 4 weeks, how much did your household spend on antimicrobials (if any)?

(في الأسابيع الـ 4 الماضية، كم أنفقته أسرته على مضادات الميكروبات) إن وجدت؟

\_\_\_\_\_ (in local currency) (بالعملة المحلية)

**If there is something you want to tell us about your experience with accessing medicines here in Columbia/ Uganda/ Yemen, you can do it here:** إذا كان هناك شيء تريد أن نخبرنا عن تجربتك في الحصول على الأدوية هنا في كولومبيا / أو غندا / اليمن ، يمكنك القيام بذلك هنا

---

---

---

---

---

**End of Block: Social D-A** الاجتماعية D-A: نهاية الكتلة

شكرا جزيلا على المشاركة في هذا الاستطلاع Thank you very much for taking part in this survey

**Do you know what antibiotic resistance is?** هل تعرف ما هي مقاومة المضادات الحيوية؟

Yes نعم

No لا

**Please specify what you think antibiotic resistance is:** يرجى تحديد ما تعتقد مقاومة المضادات الحيوية:

---

**Do you think antibiotic resistance will affect your personal health in the future?**

هل تعتقد أن مقاومة المضادات الحيوية ستؤثر على صحتك الشخصية في المستقبل؟

Yes نعم

No لا

---



**Start of Block: Understanding of Antimicrobials** بدابة الكتلة :فهم مضادات الميكروبات

---

**18. Do you take antimicrobials when you have a cold or a flu?** هل تأخذ مضادات الميكروبات عندما يكون لديك نزلة برد أو إنفلونزا؟  
18. هل تأخذ مضادات الميكروبات عندما يكون لديك نزلة برد أو إنفلونزا؟

Yes نعم

No لا

---

**19. Do you take antimicrobials to prevent a cold a flu?** هل تأخذ مضادات الميكروبات لمنع نزلة برد الإنفلونزا؟  
19. هل تأخذ مضادات الميكروبات لمنع نزلة برد الإنفلونزا؟

Yes نعم

No لا

---

**20. Have you ever shared antibiotics with members of your family/friends?**

20. هل سبق لك أن شاركت المضادات الحيوية مع أفراد عائلتك /أصدقائك؟

Yes نعم

No لا

---

**21. When you don't get a prescription for antibiotics from a doctor, do you obtain them somewhere else?**

21. عندما لا تحصل على وصفة طبية للمضادات الحيوية من الطبيب، هل تحصل عليها في مكان آخر؟

- Yes, from family members نعم، من أفراد العائلة
- Yes, from a pharmacy نعم، من صيدلية
- No, I will use old ones I have left لا، سأستخدم القديمة التي تركتها
- No, I won't use antibiotics then لا، لن أستخدم المضادات الحيوية بعد ذلك

**End of Block: Use of medicine-A-1** -نهاية الكتلة: استخدام الدواء A-1

---
