# Supplementary material for: Access to and utilisation of antimicrobials among forcibly displaced persons in Uganda, Yemen and Colombia: a pilot cross-sectional survey
Source: PubMed Central journal article supplement — BMJ Open. 2024 Jul 16;14(7):e084734. doi: 10.1136/bmjopen-2024-084734 (PMC11253744; doi:10.1136/bmjopen-2024-084734), 2024-07-16
Supplement: bmjopen-14-7-s003.pdf [file bmjopen-14-7-s003.pdf]

## **Cuestionario sobre uso de medicamentos**

Estimado señor/a,

Este estudio es sobre el acceso y uso de antibióticos en poblaciones desplazadas. Los objetivos principales de este estudio son identificar las barreras a las que se enfrenta en el acceso a medicamentos en Colombia, así como la forma en la que los usa. Su participación nos ayuda mucho. Por favor lea la siguiente información con atención.

### **¿Qué debo hacer?**

Por favor responda el siguiente cuestionario. Las preguntas se relacionan principalmente al acceso y uso de antibióticos. Por favor responda las preguntas con la mayor exactitud posible. La encuesta tiene una duración aproximada de 15 minutos. Luego de completar el cuestionario, dele clic en “Terminar” para enviar sus respuestas.

### **¿Mi estado legal se verá afectado por mis respuestas?**

No, este estudio no afecta su proceso de asilo. Nadie se enterará de las respuestas que proporciona. La encuesta es anónima, lo cual significa que no sabemos quién responde el cuestionario.

### **¿Tengo que participar en el estudio?**

La participación es voluntaria. Tiene la libertad de rehusarse a responder cualquier pregunta que pudiera incomodarlo. Es libre de decidir. Por favor recuerde que la encuesta es anónima.

Si tiene preguntas o inquietudes, por favor contactar a:

Nombre:

Institución:

Dirección de la institución:

Correo electrónico:

Número de teléfono:

### **Inicio del bloque: Uso de medicamentos-A-1**

En esta sección del cuestionario se le preguntará sobre el acceso que tiene y el uso que le da a antimicrobianos. Por favor responda las siguientes preguntas con base en un solo antimicrobiano. En caso de haber tomado más de un medicamento, será direccionado para responder preguntas adicionales para cada medicamento. (¿mejor antibiótico?)

---

**1. Ha tomado cualquier antimicrobiano (medicamento como antibiótico o para malaria o gusanos/lombrices) en los últimos 30 días?**

☐ Si

☐ No

---

**2. Le ha dado cualquier antimicrobiano (antibiótico o para malaria o gusanos/lombrices) a su hijo/a en los últimos 30 días?**

☐ Si

☐ No

---

**3. ¿Cuál es el nombre del antimicrobiano que tomó o le dio a su hijo/a?**

---

**4. ¿Cuál es el nombre de la compañía que produce el antimicrobiano?**

---

**5. ¿Dónde fue producido?**

---

**6. ¿Cuál es la fecha de vencimiento? ¿Viene en un empaque original?**

---

**7. Con qué frecuencia tomó o administró el medicamento?**

- ☐ Una vez al día
- ☐ Dos veces al día
- ☐ Tres veces al día
- ☐ Más de tres veces al día. Por favor especifique: \_\_\_\_\_
- ☐ Un día de por medio
- ☐ Una vez a la semana
- ☐ Una vez al mes
- ☐ Otro (por favor especifique): \_\_\_\_\_

**8. Presentación del medicamento:**

- ☐ Tableta
- ☐ Cápsula
- ☐ Polvo
- ☐ Supositorio
- ☐ Crema/gel/loción/espray/pomada
- ☐ Jarabe
- ☐ Gotas
- ☐ Inyección
- ☐ Otra: (Por favor especifique): \_\_\_\_\_

---

**9. Como obtuvo este medicamento?**

- ☐ Me lo formuló un médico.
- ☐ Lo compré sin formula en una farmacia/tienda de medicamentos/chemist? \*\*\*\*\*
- ☐ Me lo dio un familiar/amigo
- ☐ Otro (por favor especifique) \_\_\_\_\_

---

**10. Cómo se tomó este antibiótico:**

- ☐ De forma regular
- ☐ Cada vez que lo necesitaba

---

**10. Se tomó el medicamento por el periodo de tiempo complete como se lo formula el medico/según la información que proporciona el empaquetado?**

- ☐ Si
- ☐ No

---

**11. Se dejó de tomar el medicamento cuando se sintió mejor?**

- ☐ Si
- ☐ No

---

**12. Se dejó de tomar el antimicrobiano cuando se sintió peor? \*\*\*\*\*Do you stop taking the antimicrobial when you felt worse?**

- ☐ Si
- ☐ No
-

**13. Se siente satisfecho con la calidad del medicamento que tomó o le administró a su hijo/a?**

- ☐ Satisfecho
- ☐ Insatisfecho
- ☐ No sabe
- 

**14. ¿Cuenta con alguna forma de probar la calidad del medicamento, por ejemplo?**

- ☐ No
- ☐ Si
- 

**15. Su decisión sobre el lugar para obtener los medicamentos está influenciada por:  
(Seleccione todas las que considere)**

- ☐ Calidad
- ☐ Distancia
- ☐ Precio
- ☐ Otro (por favor especifique): \_\_\_\_\_
-

**16. Como adquirió los medicamentos? How was the medicine paid for?**

- ☐ Por medios propios (de mi propio bolsillo)
  - ☐ Seguro
  - ☐ Me lo dieron en una institución de salud (gratis)
  - ☐ Otro (por favor especifique): \_\_\_\_\_
- 

**17. Considera que la calidad de los medicamentos donde vive actualmente es un problema? ¿O está o ha estado preocupado por la calidad de medicamentos, en particular antimicrobianos?**

- ☐ No
- ☐ Si

**Final del bloque: Uso de medicamentos-A-1**

---

**18. Con base en su experiencia, ¿qué tanto limitan estos factores su acceso a antimicrobianos en Colombia? (por favor rellene solo un círculo por cada fila)**

|                                                                | Ningún<br>efecto: 1   | Poco<br>efecto***     | Algún<br>efecto       | Efecto<br>grande      | Efecto<br>muy<br>grande |
|----------------------------------------------------------------|-----------------------|-----------------------|-----------------------|-----------------------|-------------------------|
| Barreras del<br>lenguaje                                       | <input type="radio"/>   |
| No hay<br>disponibilidad<br>de ciertos<br>medicamentos         | <input type="radio"/>   |
| Barreras<br>económicas                                         | <input type="radio"/>   |
| El<br>medicamento<br>que necesito<br>requiere<br>fórmula       | <input type="radio"/>   |
| Tiempo para<br>llegar al<br>centro de<br>salud más<br>cercano  | <input type="radio"/>   |
| Tiempo para<br>llegar a la<br>farmacia más<br>cercana          | <input type="radio"/>   |
| Desconfianza<br>con el<br>personal en el<br>centro de<br>salud | <input type="radio"/>   |

- a. Cree usted que existe un comportamiento hostil por parte de los trabajadores de la salud hacia los refugiados/PIDs
- b. Siente que recibe tratamientos de menor calidad por su condición de refugiado/PID?
- c. Siente que no tiene poder de decisión en cuanto al tratamiento de su salud?

**Inicio del bloque: Información general-A**

*En esta sección se abordarán preguntas generales sobre usted.*

---

**19. Usted es:**

- ☐ Hombre (1)
- ☐ Mujer (2)
- ☐ Prefiero no responder (3)

---

**20. Qué edad tiene?**

- ☐ 18-19 años
  - ☐ 20-29 años
  - ☐ 30-39 años
  - ☐ 40-49 años
  - ☐ 50-59 años
  - ☐ 60-69 años
  - ☐ 70 años o más
-

**21. Qué nacionalidad tiene?**

☐ Venezolana

☐ Otra (por favor especifique):

---

**22. Qué idiomas habla?**

---

---

**23. Desde cuando se está quedando en Colombia?**

☐ Año \_\_\_\_\_

☐ Mes \_\_\_\_\_

**24. Cuál es su ultimo nivel educativo alcanzado?**

- ☐ No recibí ningún nivel de educación
- ☐ Certificado de escuela primaria
- ☐ Certificado de escuela intermedia
- ☐ Certificado de escuela secundaria (general) (¿bachiller?)
- ☐ Educación en escuela secundaria politécnicaPolytechnic secondary school education
- ☐ Técnico (¿technical college?)
- ☐ Grado Universitario
- ☐ ¿¿¿Grado universitario superior???\*\*\*\*Higher University degree (Diploma, Master or Doctorado)
- ☐ Otro (Por favor especifique):  

---

**25. Cuál de los siguientes describe su estado profesional?**

- ☐ Desempleado
- ☐ Empleado tiempo completo
- ☐ Empleado, tiempo parcial
- ☐ Empleado ocasional o irregularmente
- ☐ Entrenamiento vocacional/aprendiz/estudiante APPRENTICESHIP?
- ☐ Retirado
- ☐ Temporalmente en permiso (permiso por paternidad/maternidad, vacaciones, etc.)

**En caso de querer comentar algo adicional sobre su experiencia con el acceso a medicamentos en Colombia, lo puede hacer aquí:**

---

---

---

---

---

**Final del bloque: Social-D-A**

---

**¿Aplicó para recibir asilo en Colombia?**

☐ Si (1)

☐ No (2)

---

**¿Cuál de las siguientes describe mejor su estado de residencia? Which of the following applies to your residency status?**

☐ Tengo un permiso de residencia por 3 años

☐ Tengo un permiso de residencia por un año

☐ Tengo un permiso de residencia permanente.

☐ Apliqué para recibir asilo, pero sigo esperando una respuesta

☐ Su deportation fue suspendida.

☐ No tengo un título de residencia.

☐ Mi título de residencia no se encuentra enlistado; por favor especifique:

---

**¿Cuál de las siguientes aplica para su estado de aseguramiento en salud?**

- ☐ Tengo un Seguro de salud.
- ☐ Tengo un vale de Seguro en salud.
- ☐ No tengo ningún tipo de Seguro en salud.

**End of Block: General Info-A**

---

**Inicio del bloque: Social D-A**

*Esta es la última parte de cuestionario. Las preguntas en esta sección incluyen preguntas sobre su situación de adaptación, su educación y empleo en Colombia.*

---

**Usted vive en:**

- ☐ Area rural
  - ☐ Pueblo pequeño Small town (5,000 a 20,000 habitantes)
  - ☐ Pueblo mediano (20,000 a 70,000 habitantes)
  - ☐ Ciudad (>100,000 habitantes)
-

**Donde vive prncipalmente?**

- ☐ En un alojamiento temporal.
- ☐ En un alojamiento comunitario.
- ☐ En un apartamento/casa.
- ☐ En un apartamento compartido.
- ☐ Otro; por favor especifique; \_\_\_\_\_

-----

**¿Desde cuándo vive en su lugar de vivienda actual? Por favor mencione al año y mes cuando se mudó al lugar donde vive ahora.**

- ☐ Año (1) \_\_\_\_\_
- ☐ Mes (2) \_\_\_\_\_

-----

-----

-----

*(Adaptado de la encuesta de vivienda de la OMS Adapted from the WHO household survey)*

**¿Cuántos cuartos tiene su hogar? (Incluyendo habitaciones, cocina, comedor)**

\_\_\_\_\_

-----

**¿En la última semana, cuánto dinero gastó su familia en comida?**

\_\_\_\_\_ (en la moneda local)

---

**Por favor escoja el nivel de gastos que su familia gastó en las últimas 4 semanas.**

☐ A

☐ B

☐ C

☐ D

☐ E

**¿En las últimas 4 semanas, cuanto gastó su familia en antimicrobianos?**

\_\_\_\_\_ (en la moneda local)

---

**Si hay algo adicional que nos quiera comentar sobre su experiencia con el acceso a medicamentos aquí en Colombia, lo puede hacer aquí:**

---

---

---

---

---

**Final del bloque: Social D-A**

---

**¿Sabe lo que es la resistencia antibiótica?**

- ☐ Si
- ☐ No

---

**Por favor especifique lo que cree que es la resistencia antibiótica:**

---

**¿Cree usted que la Resistencia antibiótica afectará su salud personal en el futuro?**

- ☐ Si
- ☐ No

---

**Inicio del bloque: Entendimiento sobre antimicrobianos**

---

**18. Toma usted antibióticos cuando tiene un resfriado o gripa?**

- ☐ Si
- ☐ No

**19. Toma usted antimicrobianos para prevenir un resfriado o una gripa?**

- ☐ Si
- ☐ No
- 

**20. Ha compartido alguna vez antibióticos con miembros de su familia o amigos?**

- ☐ Si
- ☐ No
- 

**21. ¿Cuándo no recibe una fórmula médica para antibióticos por parte de un médico, los obtiene de otra forma?**

- ☐ Si, de miembros de la familia
- ☐ Si, en una farmacia
- ☐ No, uso antibióticos antiguos que tengo de sobra
- ☐ No, no uso antibióticos si no tengo la fórmula para ellos

**Final del bloque: Uso de medicamentos A-1**

---
