# Supplementary material for: Access to and utilisation of antimicrobials among forcibly displaced persons in Uganda, Yemen and Colombia: a pilot cross-sectional survey
Source: PubMed Central journal article supplement — BMJ Open. 2024 Jul 16;14(7):e084734. doi: 10.1136/bmjopen-2024-084734 (PMC11253744; doi:10.1136/bmjopen-2024-084734), 2024-07-16
Supplement: bmjopen-14-7-s004.pdf [file bmjopen-14-7-s004.pdf]

## استبيان حول الوصول لمضادات الميكروبات واستخدامها بين النازحين في عدن: دراسة استطلاعية

عزيزي السيد/السيدة،

هذه الدراسة تتعلق بالحصول على المضادات الحيوية واستخدامها بين السكان الذين أعيد توطينهم. الأهداف الرئيسية لهذه الدراسة هي معرفة العقبات التي تواجهك في الحصول على الأدوية في اليمن / كولومبيا / أوغندا وكيفية استخدامك للأدوية.

مشاركتك معنا تساهم بشكل كبير في إنجاح هذه الدراسة. يرجى قراءة النص التالي بعناية.

ماذا يجب أن أفعل؟

- يرجى الإجابة على الاستبيان التالي. ترتبط الأسئلة بشكل رئيسي بالحصول على المضادات الحيوية واستخدامها.
- يرجى الإجابة على جميع الأسئلة بأدق قدر ممكن. تستغرق الدراسة الاستقصائية حوالي 15 دقيقة. بعد الانتهاء من الاستبيان، انقر فوق "إنهاء" لإرسال إجاباتك.

هل تؤثر إجاباتي على وضعي القانوني؟

- لا. الدراسة مستقلة عن إجراءات اللجوء الخاصة بك. لن يعرف أحد الإجابات التي قدمتها. الاستبيان مجهول الهوية. وهذا يعني أننا لا نعرف من أجاب على الاستبيان.

هل يجب أن أشارك في الدراسة؟

- المشاركة في هذا الاستبيان اختيارية، ويمكنك رفض الإجابة عن أي سؤال تشعر بعدم الارتياح عند الإجابة عليه. أنت حر في اتخاذ قرارك. يرجى تذكر أن الاستبيان مجهول الهوية.

إذا كانت لديك أي أسئلة أو مخاوف بشأن الدراسة، فيرجى الاتصال بـ:

الاسم :

المؤسسة:

عنوان المؤسسة :

البريد الإلكتروني:

رقم الهاتف:

- نشكركم جزيلاً على استعدادكم للمشاركة في استبياننا سيتناول هذا القسم بعض الأسئلة العامة حولك.

معلومات عامة (أ) تكملة:

هل أنت:

ذكر  أنثى

كم هو عمرك

•  ١٨-١٩ سنة

•  ٢٠-٢٩ سنة

•  ٣٠-٣٩ سنة

•  ٤٠-٤٩ سنة

•  ٥٠-٥٩ سنة

•  ٦٠-٦٩ سنة

- ٧٠ سنة أو أكثر

ماهي جنسيتك؟

- يمني/ة

- جنسية أخرى (الرجاء تحديد): \_\_\_\_\_

ما الذي ينطبق على تأمينك الصحي؟

- لدي بطاقة تأمين صحي
- لدي قسيمة تأمين صحي
- ليس لدي تأمين صحي

في هذا الجزء من الاستبيان، سوف نسألك عن إمكانية حصولك على الأدوية واستخدامك لها. يرجى الإجابة على الأسئلة التالية لدواء واحد فقط. إذا كنت قد تناولت أكثر من دواء واحد، فستتم إعادة توجيهك للإجابة على الأسئلة التالية لكل دواء.

1. هل تناولت أي عامل مضاد للميكروبات؟

دواء يستخدم على سبيل المثال للسعال أو العدوى، أو للملاريا أو الديدان (أو مكملات غذائية مثل فيتامين ب أو فيتامينات أو معادن أخرى) خلال الثلاثين يوماً الماضية؟

- نعم
- لا

2. هل أعطيت أي عامل مضاد للميكروبات؟ على سبيل المثال أدوية السعال أو العدوى، أو الملاريا أو الديدان (أو مكملات غذائية مثل فيتامين ب أو فيتامينات أو معادن أخرى) لطفلك خلال الثلاثين يوماً الماضية؟

- نعم
- لا

3. ما هو اسم العامل المضاد للميكروبات الذي تناولته أو أعطيته لطفلك؟

4. ما هو اسم الشركة التي تنتج المضاد الحيوي؟

5. أين تم إنتاجه؟

6. كم مرة تناولت أو أعطيت الدواء؟

- مرة واحدة في اليوم
- مرتين في اليوم
- ثلاث مرات في اليوم
- أكثر من ثلاث مرات في اليوم. يرجى ذكر: \_\_\_\_\_
- كل يومين
- مرة واحدة في الأسبوع

- مرة واحدة في الشهر
- أخرى. يرجى ذكر: \_\_\_\_\_

7. شكل جرعة الدواء:

- قرص
- كبسولة
- مسحوق
- تحميلة
- مرهم / كريم / جل / لوشن /بخاخ
- شراب
- قطرات
- حقنة
- أخرى، يرجى تحديدها \_\_\_\_\_

8. كيف حصلت على هذا الدواء؟

- وصفه لي الطبيب.
- اشتريته بدون وصفة طبية من صيدلية /متجر أدوية /كيميائي.
- أعطاه لي أحد الأقارب /الأصدقاء
- من خزانة الأدوية (وصفه الطبيب)
- من خزانة الأدوية (لا أعرف ما إذا كان دواءً بدون وصفة طبية أو وصفه الطبيب)
- أخرى، يرجى تحديدها \_\_\_\_\_

9. أنت تتناول هذا الدواء:

- بانتظام
- عند الحاجة
- إذا كانت إجابتك على "هل تناولت أي أدوية أو مكملات غذائية مثل فيتامين ب أو فيتامينات أو معادن أخرى " ...هي نعم
- كم مرة تناولت هذا الدواء في الأيام السبعة الماضية؟

إذا كانت إجابتك على "هل تناولت أي أدوية أو مكملات غذائية مثل فيتامين ب أو فيتامينات أو معادن أخرى " ...هي نعم

• شكل جرعة الدواء:

- قرص
- كبسولة
- مسحوق
- تحميلة
- مرهم
- كريم

- جل
- لوشن
- شراب
- قطرات
- بخاخ
- حقنة

• أخرى، يرجى تحديدها

10. هل تناولت الدواء للمفتره الكامله كما وصفها لك الطبيب /المعلومات المقدمة داخل العبوة؟

- نعم
- لا

11. هل تتوقف عن تناول المضاد الحيوي عندما تشعر بتحسن؟

- نعم
- لا

إذا كانت إجابتك على "هل تناولت أي أدوية أو مكملات غذائية مثل فيتامين ب أو فيتامينات أو معادن أخرى "...هي نعم، وإجابتك على "أن ت تناول هذا الدواء "هي بانتظام

• كم مرة تتناول هذا الدواء؟

- مرة واحدة في اليوم
- مرتين في اليوم
- ثلاث مرات في اليوم
- أكثر من ثلاث مرات في اليوم .يرجى ذكر:
- كل يومين
- مرة واحدة في الأسبوع
- مرة واحدة في الشهر

• أخرى، يرجى تحديدها

إذا كانت إجابتك على "هل تناولت أي أدوية أو مكملات غذائية مثل فيتامين ب أو فيتامينات أو معادن أخرى "...هي نعم، وإجابتك على "أن ت تناول هذا الدواء "هي بانتظام

• منذ متى وأنت تتناول هذا الدواء؟

- أكثر من ثلاث سنوات
- أكثر من سنة واحدة
- أكثر من ستة أشهر
- أكثر من ثلاثة أشهر
- أكثر من أربعة أسابيع
- أكثر من أسبوع واحد
- أقل من أسبوع واحد

إذا كانت إجابتك على "هل تناولت أي أدوية أو مكملات غذائية مثل فيتامين ب أو فيتامينات أو معادن أخرى "...هي نعم

• هل استخدمت هذا الدواء في آخر 24 ساعة؟

- نعم

• لا

12. هل تتوقف عن تناول المضاد الحيوي عندما تشعر بسوء؟

• نعم

• لا

13. هل أنت راضٍ عن جودة الدواء الذي استخدمته أو أعطيته لطفلك؟

• راضٍ

• غير راضٍ

• لا أعرف

14. هل لديك طريقة لاختبار جودة الدواء، على سبيل المثال عن طريق بطاقة الخدش؟

• لا

• نعم

15. هل يتأثر قرارك بشأن مكان الحصول على الأدوية بما يلي؟ (اختر الكل المناسب)

• الجودة

• المسافة

• السعر

• أخرى، يرجى تحديدها

16. كيف تم دفع ثمن الدواء؟

• من جيبتي الخاص

• التأمين

• تم إعطاؤه في مرفق الرعاية الصحية (مجاًناً)

• أخرى، يرجى تحديدها

17. هل تعتقد أن جودة الدواء في المكان الذي تعيش فيه الآن مشكلة؟

• لا

• نعم

إذا كانت إجابتك على "هل تناولت أي أدوية أو مكملات غذائية مثل فيتامين ب أو فيتامينات أو معادن أخرى" "...هي نعم

• هل تناولت أي دواء أو مكملات غذائية أخرى مثل الفيتامينات أو المعادن (خلال الثلاثين يوماً الماضية)؟

• نعم

• لا

#### الالتزام

هل لديك أي أمراض مزمنة طويلة الأمد؟

• نعم

• لا

• لا أعرف

هل تتناول أي دواء للمرض المزمن الذي تعاني منه؟

- نعم
- لا

إذا كانت إجابتك على "هل لديك أي أمراض مزمنة طويلة الأمد؟" هي نعم

- هل فانتك جرعة من أي من الأدوية التي تتناولها لمرض مزمن في الأيام السبعة الماضية؟
- نعم
- لا

إذا كانت إجابتك على "هل لديك أي أمراض مزمنة طويلة الأمد؟" هي نعم، وإجابتك على "هل فانتك جرعة من أي من الأدوية التي تتناولها لمرض مزمن في الأيام السبعة الماضية؟" هي نعم

- املاً الجدول التالي لكل دواء فانتك جرعته في الأيام السبعة الماضية:

| اسم الدواء | عدد المرات التي فانتك فيها جرعة هذا الدواء في آخر 7 أيام |
|------------|----------------------------------------------------------|
|            |                                                          |
|            |                                                          |
|            |                                                          |
|            |                                                          |
|            |                                                          |

إذا كانت إجابتك على "هل لديك أي أمراض مزمنة طويلة الأمد؟" هي نعم

- هل يزعجك أي من الأدوية التي تتناولها للمرض المزمن الذي تعاني منه بأي شكل من الأشكال؟
- نعم
- لا

إذا كانت إجابتك على "هل لديك أي أمراض مزمنة طويلة الأمد؟" هي نعم، وإجابتك على "هل يزعجك أي من الأدوية التي تتناولها للمرض المزمن الذي تعاني منه بأي شكل من الأشكال؟" هي نعم

- يرجى تسمية الدواء وشرح كيف يزعجك.

| اسم الدواء | بأي طريقة يزعجك؟ |
|------------|------------------|
|            |                  |
|            |                  |
|            |                  |
|            |                  |
|            |                  |

إذا كانت إجابتك على "هل لديك أي أمراض مزمنة طويلة الأمد؟" هي نعم

- ما مدى المشكلة أو القلق الذي تواجهه في المجالات التالية:

| مشكلة كبيرة | مشكلة بسيطة | لا توجد مشكلة |                                                   |
|-------------|-------------|---------------|---------------------------------------------------|
| 0           | 0           | 0             | يسبب دوائي آثارًا جانبية                          |
| 0           | 0           | 0             | من الصعب تذكر جميع الجرعات                        |
| 0           | 0           | 0             | من الصعب دفع ثمن الدواء                           |
| 0           | 0           | 0             | من الصعب فتح الحاوية                              |
| 0           | 0           | 0             | من الصعب الحصول على إعادة التعبئة في الوقت المحدد |

|   |   |   |                                               |
|---|---|---|-----------------------------------------------|
| 0 | 0 | 0 | من الصعب قراءة الطباعة على الحاوية            |
| 0 | 0 | 0 | أوقات الجرعات غير ملائمة                      |
| 0 | 0 | 0 | يسبب دوائي مشاكل أو مخاوف أخرى .يرجى التوضيح: |

إذا كانت إجابتك على "هل لديك أي أمراض مزمنة طويلة الأمد؟" هي نعم

• هل توقفت عن تناول أي أدوية موصوفة للأمراض المزمنة التي تعاني منها في الأشهر الستة الماضية؟

• نعم

• لا

إذا كانت إجابتك على "هل لديك أي أمراض مزمنة طويلة الأمد؟" هي نعم، وإجابتك على "هل توقفت عن تناول أي أدوية موصوفة للأمراض المزمنة التي تعاني منها في الأشهر الستة الماضية؟" هي نعم

• يرجى سرد الأدوية التي توقفت عن تناولها لكل منها، أجب عن الأسئلة في المربعات:

| اسم الدواء | لاي سبب كنت تتناوله | ما مدى نجاح الدواء بالنسبة لك؟ (1 = جيد جداً، 2 = إلى حد ما، 3 = ليس على الإطلاق، 4 = لا أعرف) | إلى أي مدى أزعجك؟ (1 = لا شيء، 2 = قليلاً، 3 = كثيرًا) | لاي سبب توقفت عن تناوله؟ |
|------------|---------------------|------------------------------------------------------------------------------------------------|--------------------------------------------------------|--------------------------|
| (1)        |                     |                                                                                                |                                                        |                          |
| (2)        |                     |                                                                                                |                                                        |                          |
| (3)        |                     |                                                                                                |                                                        |                          |
| (4)        |                     |                                                                                                |                                                        |                          |

18. إذا كانت إجابتك على "هل لديك أي أمراض مزمنة طويلة الأمد؟" هي نعم

• هل كنت تتناول بانتظام أدوية في المنزل لم تتمكن من الوصول إليها ؟

• نعم

• لا

إذا كانت إجابتك على "هل كنت تتناول بانتظام أدوية في المنزل لم تتمكن من الوصول إليها ؟" هي نعم

• ما هي الأدوية التي تقصدها؟ يرجى ذكر كل دواء لم تتمكن من الوصول إليه .

إذا كانت إجابتك على "هل كنت تتناول بانتظام أدوية في المنزل لم تتمكن من الوصول إليها ؟" هي نعم

• لماذا لم تتمكن من الوصول إلى الأدوية التي كنت تتناولها بانتظام ؟ (ممكن اختيار أكثر من خيار واحد)

• هذه الأدوية باهظة الثمن الآن

• لا أستطيع العثور عليها في الصيدليات

• لا أستطيع الحصول على هذه الأدوية بدون وصفة طبية

• أسباب أخرى ، يرجى تحديدها

بناءً على تجربتك، إلى أي مدى تحد هذه العوامل من حصولك على المضادات الحيوية ؟ (يرجى ملء دائرة واحدة لكل صف)

لا يوجد تأثير على الإطلاق: 1 2 3 4 5 6 7 تأثير كبير جداً :

|   |   |   |   |   |   |   |   |                                           |
|---|---|---|---|---|---|---|---|-------------------------------------------|
| 0 | 0 | 0 | 0 | 0 | 0 | 0 | 0 | حواجز التواصل                             |
| 0 | 0 | 0 | 0 | 0 | 0 | 0 | 0 | عدم توفر أدوية معينة في الصيدليات         |
| 0 | 0 | 0 | 0 | 0 | 0 | 0 | 0 | الحاجز المالي                             |
| 0 | 0 | 0 | 0 | 0 | 0 | 0 | 0 | الدواء الذي أحتاجه هو دواء بوصفة طبية فقط |
| 0 | 0 | 0 | 0 | 0 | 0 | 0 | 0 | الوقت للوصول إلى أقرب مركز رعاية صحية     |
| 0 | 0 | 0 | 0 | 0 | 0 | 0 | 0 | الوقت للوصول إلى أقرب صيدلية              |

قبل تناول أي دواء، هل تتحقق مما إذا كان يحتوي على أي كحول أو منتجات لحم الخنزير؟

|           |   |   |   |   |   |               |   |                    |
|-----------|---|---|---|---|---|---------------|---|--------------------|
| أبداً 1 : | 2 | 3 | 4 | 5 | 6 | في كل مرة 7 : | 0 | الكحول             |
| 0         | 0 | 0 | 0 | 0 | 0 | 0             | 0 | منتجات لحم الخنزير |

هل ستتناول دواءً يحتوي على أي كحول أو منتجات لحم الخنزير؟

|               |   |   |   |   |   |                   |   |                    |
|---------------|---|---|---|---|---|-------------------|---|--------------------|
| لا، أبداً 1 : | 2 | 3 | 4 | 5 | 6 | نعم، بالتأكيد 7 : | 0 | الكحول             |
| 0             | 0 | 0 | 0 | 0 | 0 | 0                 | 0 | منتجات لحم الخنزير |

بداية القسم :معلومات عامة -أ سيتناول هذا القسم بعض الأسئلة العامة عنك.

19. ما هو أعلى مستوى تعليمي حصلت عليه؟

- لم أتلق أي تعليم مدرسي
- شهادة المدرسة الابتدائية
- شهادة المدرسة الإعدادية
- شهادة الثانوية العامة (عام)



- التعليم الثانوي الفني
- الكلية التقنية
- شهادة جامعية (بكالوريوس)
- شهادة جامعية عليا (دبلوم، ماجستير أو دكتوراه)
- أخرى، يرجى تحديدها

20. أي مما يلي يصف وضعك المهني؟

- لا، غير موظف
- نعم، موظف بدوام كامل
- نعم، موظف بدوام جزئي
- نعم، موظف بشكل عرضي أو غير منتظم
- نعم، تدريب مهني /تدريب مهني /طالب
- متقاعد

إذا كان هناك شيء تريد إخبارنا به عن تجربتك في الحصول على الأدوية هنا ، يمكنك القيام بذلك هنا:

أي مما يلي ينطبق على تأمينك الصحي؟

- لدي بطاقة تأمين صحي
- لدي قسيمة تأمين صحي
- ليس لدي تأمين صحي

إذا كان الدواء الذي أحتاجه يحتوي على كحول أو منتجات لحم الخنزير ولم يكن هناك بديل له، فهل سأتناول هذا الدواء؟

| لا<br>أوافق بشدة | لا<br>أوافق إلى حد ما | لا أوافق | غير متأكد | أوافق إلى حد ما | أوافق |                    |
|------------------|-----------------------|----------|-----------|-----------------|-------|--------------------|
| 0                | 0                     | 0        | 0         | 0               | 0     | الكحول             |
| 0                | 0                     | 0        | 0         | 0               | 0     | منتجات لحم الخنزير |

نهاية القسم :معلومات عامة -أ

بداية القسم :الحالة الاجتماعية -أ

هذا هو الجزء الأخير من الاستبيان .تتضمن الأسئلة في هذا الجزء أسئلة حول وضع الإقامة والتعليم والعمل .

المكان الذي تعيش فيه هو:

- منطقة ريفية
- بلدة صغيرة 5000 إلى 20000 نسمة
- بلدة متوسطة الحجم 20000 إلى 70000 نسمة
- مدينة 100000 > نسمة

ما هي حالتك الاجتماعية؟

- متزوج، أعيش مع زوجي/زوجتي
- متزوج، أعيش منفصلاً عن زوجي/زوجتي
- أعزب
- مطلق
- أرمل

أين تعيش بشكل رئيسي؟

- في سكن مؤقت
- في سكن مشترك
- في شقة /منزل
- في مخيم
- أخرى (يرجى تحديدها) \_\_\_\_\_

منذ متى وأنت تعيش في مكان إقامتك الحالي؟ يرجى ذكر السنة والشهر الذي انتقلت فيه إلى المكان الذي تعيش فيه الآن.

- السنة \_\_\_\_\_
- الشهر \_\_\_\_\_

ما هو صافي دخل أسرتك الشهري ككل؟ ريال يماني \_\_\_\_\_

هل يمكنك من فضلك إخباري كم عدد الغرف (غرف النوم، غرفة الطعام، المطبخ..) في منزلك؟

في الأسبوع الماضي، كم أنفقت أسرتك على الطعام؟ ريال يماني \_\_\_\_\_

في الأسابيع الأربعة الماضية، كم أنفقت أسرتك على المضادات الحيوية (إن وجدت)؟ ريال يماني \_\_\_\_\_

شكراً جزيلاً لك على المشاركة في هذا الاستطلاع
